# Supplementary material for: Development of a human milk concentrate with human milk lyophilizate for feeding very low birth weight preterm infants: A preclinical experimental study
Source: PubMed Central journal article supplement (PMC6382113; doi:10.1371/journal.pone.0210999), 2019-02-20
Supplement: pone.0210999.s002.pdf [file pone.0210999.s002.pdf]

**S1 Table.** Mean and confidence interval 90% for osmolality, macronutrients, and micronutrients expressed per 100 kcal in the samples of types HM baseline, HMCI, HMC3m, and HMC6m.

| Dosages (units)                       | HM baseline            | HMCI                   | HMC3m                  | HMC6m                  |
|---------------------------------------|------------------------|------------------------|------------------------|------------------------|
| Volume (ml)                           | 177.6                  | 125.1                  | 129.9                  | 129.7                  |
| Protein (g)                           | 1.59 (1.39-1.80)       | 1.85 (1.68-2.02)       | 1.81 (1.62-1.99)       | 1.91 (1.74-2.07)       |
| Carbohydrate (g)                      | 12.57 (12.29-12.85)    | 11.48 (11.28-11.68)    | 11.96 (11.77-12.15)    | 11.90 (11.71-12.10)    |
| Total lipids (g)                      | 4.60 (4.14-5.05)       | 5.04 (4.61-5.46)       | 4.78 (4.36-5.19)       | 4.79 (4.37-5.20)       |
| Total solids (g)                      | 19.11 (18.56-19.66)    | 18.48 (17.96-18.98)    | 18.81 (18.26-19.35)    | 18.85 (18.32-19.36)    |
| True Protein (g)                      | 1.33 (1.16-1.50)       | 1.50 (1.36-1.64)       | 1.47 (1.31-1.62)       | 1.54 (1.41-1.67)       |
| Osmolality (mOsm/Kg H <sub>2</sub> O) | 289.48 (279.17-396.25) | 452.12 (437.99-559.85) | 456.16 (442.79-564.36) | 458.14 (444.99-458.14) |
| Calcium (mg)                          | 41.27 (39.30-43.24)    | 45.70 (43.56-47.81)    | 50.23 (48.31-52.15)    | 52.69 (50.85-54.54)    |
| Magnesium (mg)                        | 4.62 (4.38-4.85)       | 5.13 (4.89-5.36)       | 5.55 (5.51-5.58)       | 5.87 (5.84-5.90)       |
| Sodium (mg)                           | 23.98 (19.87-28.09)    | 27.84 (22.84-32.83)    | 31.81 (26.81-36.80)    | 30.24 (25.90-35.58)    |
| Potassium (mg)                        | 106.81 (100.59-113.01) | 126.83 (118.87-134.79) | 131.85 (125.01-138.68) | 149.43 (142.26-156.60) |
| Copper (µg)                           | 59.82 (53.69-65.93)    | 60.42 (54.51-66.33)    | 53.47 (48.82-58.10)    | 50.95 (46.74-55.14)    |
| Zinc (mg)                             | 0.26 (0.21-0.32)       | 0.25 (0.22-0.29)       | 0.29 (0.24-0.33)       | 0.33 (0.28-0.37)       |
| Phosphorus (mg)                       | 25.9 (23.43-28.53)     | 23.10 (21.34-24.87)    | 26.45 (24.14-28.75)    | 26.59 (24.33-28.84)    |

HM baseline: Human milk baseline; HMCI: HM concentrated for immediate analysis; HMC3m: HM concentrate for analysis after 3 months of storage; HMC6m: HM concentrate for analysis after 6 months of storage; Mean (confidence interval 90%).
