# Supplementary material for: Development of a human milk concentrate with human milk lyophilizate for feeding very low birth weight preterm infants: A preclinical experimental study
Source: PubMed Central journal article supplement (PMC6382113; doi:10.1371/journal.pone.0210999), 2019-02-20
Supplement: pone.0210999.s004.pdf [file pone.0210999.s004.pdf]

*The SAS System*

*The MEANS Procedure*

| <b>Time</b>    | <b>N<br/>Obs</b> | <b>Variable</b> | <b>Mean</b> | <b>Std Dev</b> | <b>Minimum</b> | <b>Lower<br/>Quartile</b> | <b>Median</b> | <b>Upper<br/>Quartile</b> | <b>Maximum</b> |
|----------------|------------------|-----------------|-------------|----------------|----------------|---------------------------|---------------|---------------------------|----------------|
| HM<br>baseline | 50               | Total lipids    | 2.59        | 1.08           | 0.80           | 1.70                      | 2.50          | 3.30                      | 5.00           |
|                |                  | Protein         | 0.90        | 0.49           | 0.30           | 0.60                      | 0.80          | 1.00                      | 2.80           |
|                |                  | Carbohydrate    | 7.08        | 0.67           | 5.10           | 6.60                      | 7.20          | 7.40                      | 8.70           |
|                |                  | Total solids    | 10.76       | 1.31           | 8.20           | 9.80                      | 10.75         | 11.90                     | 13.70          |
|                |                  | Energy          | 56.30       | 10.51          | 37.00          | 48.00                     | 55.00         | 65.00                     | 80.00          |
|                |                  | True protein    | 0.75        | 0.40           | 0.20           | 0.50                      | 0.70          | 0.90                      | 2.30           |
|                |                  | Osmolality      | 289.48      | 43.64          | 182.00         | 275.00                    | 292.00        | 299.00                    | 477.00         |
| HMC1           | 50               | Total lipids    | 4.03        | 1.44           | 1.30           | 3.20                      | 4.00          | 4.80                      | 7.50           |
|                |                  | Protein         | 1.48        | 0.58           | 0.50           | 1.10                      | 1.40          | 1.70                      | 3.80           |
|                |                  | Carbohydrate    | 9.18        | 0.68           | 7.50           | 8.70                      | 9.30          | 9.70                      | 10.10          |
|                |                  | Total solids    | 14.77       | 1.72           | 11.30          | 13.70                     | 14.65         | 15.90                     | 18.40          |
|                |                  | Energy          | 79.96       | 13.75          | 56.00          | 70.00                     | 78.50         | 89.00                     | 109.00         |
|                |                  | True protein    | 1.20        | 0.48           | 0.40           | 0.90                      | 1.10          | 1.40                      | 3.10           |
|                |                  | Osmolality      | 452.12      | 59.79          | 338.00         | 417.00                    | 467.50        | 493.00                    | 564.00         |
| HMC3m          | 50               | Total lipids    | 3.68        | 1.34           | 1.30           | 2.80                      | 3.70          | 4.50                      | 6.80           |
|                |                  | Protein         | 1.39        | 0.61           | 0.40           | 1.00                      | 1.30          | 1.70                      | 3.70           |
|                |                  | Carbohydrate    | 9.21        | 0.63           | 7.80           | 8.80                      | 9.35          | 9.70                      | 10.10          |
|                |                  | Total solids    | 14.48       | 1.78           | 10.70          | 13.30                     | 14.45         | 15.70                     | 18.30          |
|                |                  | Energy          | 76.98       | 13.91          | 52.00          | 67.00                     | 76.50         | 86.00                     | 109.00         |
|                |                  | True protein    | 1.13        | 0.49           | 0.20           | 0.90                      | 1.05          | 1.40                      | 3.00           |
|                |                  | Osmolality      | 456.16      | 56.58          | 330.00         | 427.00                    | 472.50        | 496.00                    | 557.00         |
| HMC6m          | 50               | Total lipids    | 3.69        | 1.35           | 1.20           | 2.80                      | 3.65          | 4.40                      | 7.10           |
|                |                  | Protein         | 1.47        | 0.54           | 0.70           | 1.10                      | 1.40          | 1.60                      | 3.80           |
|                |                  | Carbohydrate    | 9.18        | 0.64           | 7.70           | 8.80                      | 9.35          | 9.70                      | 10.20          |
|                |                  | Total solids    | 14.53       | 1.71           | 11.20          | 13.30                     | 14.45         | 15.50                     | 18.80          |
|                |                  | Energy          | 77.30       | 13.78          | 54.00          | 68.00                     | 75.50         | 84.00                     | 113.00         |
|                |                  | True protein    | 1.19        | 0.43           | 0.60           | 0.90                      | 1.10          | 1.30                      | 3.10           |
|                |                  | Osmolality      | 458.14      | 55.67          | 338.00         | 430.00                    | 473.00        | 497.00                    | 559.00         |
