# Supplementary material for: Development of a human milk concentrate with human milk lyophilizate for feeding very low birth weight preterm infants: A preclinical experimental study
Source: PubMed Central journal article supplement (PMC6382113; doi:10.1371/journal.pone.0210999), 2019-02-20
Supplement: pone.0210999.s005.pdf [file pone.0210999.s005.pdf]

*The SAS System*

*The MEANS Procedure*

| <b>Time</b>    | <b>N<br/>Obs</b> | <b>Variable</b> | <b>Mean</b> | <b>Std Dev</b> | <b>Minimum</b> | <b>Lower<br/>Quartile</b> | <b>Median</b> | <b>Upper<br/>Quartile</b> | <b>Maximum</b> |
|----------------|------------------|-----------------|-------------|----------------|----------------|---------------------------|---------------|---------------------------|----------------|
| HM<br>baseline | 50               | Sodium          | 135.04      | 98.03          | 22.00          | 70.00                     | 107.00        | 146.00                    | 464.00         |
|                |                  | Potassium       | 601.38      | 147.98         | 336.10         | 512.00                    | 578.60        | 683.00                    | 1066.50        |
|                |                  | Calcium         | 23.24       | 4.70           | 13.00          | 20.20                     | 22.30         | 27.40                     | 31.20          |
|                |                  | Magnesium       | 2.14        | 0.46           | 1.34           | 1.80                      | 2.04          | 2.42                      | 3.52           |
|                |                  | Phosphorus      | 14.63       | 6.09           | 6.50           | 10.90                     | 13.15         | 16.70                     | 45.40          |
|                |                  |                 | 149.10      | 128.15         | 22.70          | 70.00                     | 105.00        | 191.00                    | 650.00         |
|                |                  |                 | 33.37       | 14.60          | 14.00          | 22.60                     | 30.10         | 41.80                     | 84.60          |
| HMCI           | 50               | Sodium          | 222.52      | 169.03         | 60.00          | 116.00                    | 166.00        | 244.00                    | 792.00         |
|                |                  | Potassium       | 1013.85     | 269.45         | 530.70         | 828.80                    | 991.05        | 1155.20                   | 1913.30        |
|                |                  | Calcium         | 36.52       | 7.18           | 20.60          | 31.80                     | 37.00         | 41.20                     | 53.20          |
|                |                  | Magnesium       | 3.38        | 0.65           | 1.74           | 2.88                      | 3.24          | 3.94                      | 5.36           |
|                |                  | Phosphorus      | 18.47       | 5.97           | 8.00           | 14.15                     | 17.35         | 22.50                     | 34.10          |
|                |                  |                 | 203.89      | 126.20         | 34.60          | 110.00                    | 182.75        | 256.00                    | 570.00         |
|                |                  |                 | 48.30       | 19.99          | 21.00          | 34.20                     | 43.80         | 58.20                     | 125.00         |
| HMC3m          | 50               | Sodium          | 244.87      | 162.80         | 76.00          | 138.00                    | 198.00        | 280.00                    | 700.00         |
|                |                  | Potassium       | 1015.04     | 222.82         | 520.00         | 855.20                    | 1004.60       | 1131.50                   | 1671.20        |
|                |                  | Calcium         | 38.67       | 6.25           | 24.20          | 36.20                     | 38.20         | 42.80                     | 50.76          |
|                |                  | Magnesium       | 3.52        | 0.83           | 2.32           | 2.88                      | 3.37          | 4.04                      | 6.38           |
|                |                  | Phosphorus      | 20.36       | 7.52           | 9.95           | 15.20                     | 18.33         | 24.95                     | 41.75          |
|                |                  |                 | 224.46      | 152.50         | 53.50          | 108.50                    | 198.50        | 282.00                    | 715.00         |
|                |                  |                 | 41.16       | 15.12          | 19.60          | 29.00                     | 41.10         | 48.40                     | 93.60          |
| HMC6m          | 50               | Sodium          | 233.19      | 141.53         | 76.00          | 132.00                    | 185.00        | 280.00                    | 710.00         |
|                |                  | Potassium       | 1152.31     | 234.18         | 730.30         | 967.90                    | 1086.85       | 1267.80                   | 1783.10        |
|                |                  | Calcium         | 40.63       | 6.02           | 26.00          | 38.40                     | 41.00         | 45.39                     | 55.45          |
|                |                  | Magnesium       | 3.73        | 0.90           | 2.34           | 3.08                      | 3.55          | 4.32                      | 6.14           |
|                |                  | Phosphorus      | 20.50       | 7.35           | 9.55           | 13.85                     | 19.70         | 24.90                     | 42.10          |
|                |                  |                 | 251.70      | 158.76         | 48.00          | 129.50                    | 212.25        | 328.00                    | 715.00         |
|                |                  |                 | 39.28       | 13.71          | 15.60          | 27.60                     | 38.80         | 47.20                     | 72.00          |
