# Supplementary material for: Development of a human milk concentrate with human milk lyophilizate for feeding very low birth weight preterm infants: A preclinical experimental study
Source: PLoS One. 2019 Feb 20;14(2):e0210999. doi: 10.1371/journal.pone.0210999 (PMC6382113; doi:10.1371/journal.pone.0210999)
Supplement: S1 Dataset — (XLSX) [file pone.0210999.s003.xlsx]

## Sheet: Osmolality Macronutrients
HM Baseline (n=50)	1	2	3	4	5	6	7	8	9	10	11	12	13	14	15	16	17	18	19	20	21	22	23	24	25	26	27	28	29	30	31	32	33	34	35	36	37	38	39	40	41	42	43	44	45	46	47	48	49
Total lipids (g/100ml)	2.2	1.1	2.1	3	3.9	1.1	1.7	3.1	1.3	3.1	2.2	0.8	2.9	3	2.1	3.9	4.2	3.4	1.2	1.7	0.9	1.9	2	1	3	2.4	1.6	3.5	2.2	1	2.5	2.4	3.3	2.8	2.5	1.5	2.8	3.8	3	5	2.3	4.5	4.8	3.6	1.6	1.6	3	3.9	3.3
Protein (g/100ml)	0.6	0.5	0.8	0.4	1.8	1	0.6	1.1	0.5	0.6	0.7	0.9	0.4	0.8	0.8	0.3	0.3	0.8	0.6	0.7	0.7	0.9	0.9	0.7	0.8	0.9	1.2	0.9	0.5	0.6	0.5	1.1	1	0.9	1.6	0.8	1	1	1.9	0.9	0.5	2.8	0.6	2.5	0.7	0.7	1	1.2	1
Carbohydrate (g/100ml)	6.3	7.6	6.3	5.1	6.4	8.3	7.6	7	8	6	6.8	6.5	7.3	7.4	7.3	7.7	7.2	6.1	6.9	6.4	7.4	8.4	8	8.7	7.2	6.3	6.7	7.3	7.5	6.5	7.1	7.4	7.4	7.5	7.7	7.2	7.2	7.2	7.3	6.9	6.8	6.2	7.2	6.1	7.4	7.5	7.4	6.6	6.8
Total solids (g/100ml)	9.3	9.4	9.4	8.7	12.4	10.7	10	11.5	9.8	9.6	9.9	8.5	10.8	11.4	10.3	12	11.9	10.5	8.9	8.9	9.2	11.4	11.1	10.6	11.2	9.7	9.7	11.9	10.4	8.2	10.3	11.1	11.9	11.3	12	98	11.2	12.2	12.4	13.3	9.8	13.7	12.7	12.3	98	10	11.6	11.9	11.3
Energy (kcal/100ml)	48	43	48	50	70	48	48	62	46	55	51	38	58	61	52	68	69	60	41	44	41	55	54	47	60	51	47	65	53	37	54	56	65	60	61	47	59	68	65	80	51	79	76	68	47	48	62	68	62
True Protein (g/100ml)	0.5	0.4	0.7	0.4	1.5	0.8	0.5	0.9	0.4	0.5	0.6	0.7	0.4	0.7	0.7	0.3	0.2	0.7	0.6	0.6	0.6	0.7	0.7	0.6	0.7	0.7	1	0.7	0.4	0.5	0.4	0.9	0.8	0.7	1.3	0.7	0.9	0.9	1.6	0.7	0.4	2.3	0.4	2	0.6	0.6	0.9	1	0.8
Osmolality (mOsm/Kg)	233	280	236	182	303	374	308	293	294	215	298	251	290	296	281	289	276	265	238	241	267	342	312	373	262	477	295	293	289	234	296	303	307	299	336	291	304	296	308	285	253	298	283	296	288	293	290	295	275
HMCI (n=50)	1	2	3	4	5	6	7	8	9	10	11	12	13	14	15	16	17	18	19	20	21	22	23	24	25	26	27	28	29	30	31	32	33	34	35	36	37	38	39	40	41	42	43	44	45	46	47	48	49
Total lipids (g/100ml)	5.7	1.3	4	3.5	6.5	2.8	3.6	4	1.8	2.7	4.4	2.8	3.5	4.7	3.9	4.8	4.8	7.5	1.5	2.8	1.8	3.8	3.8	3.1	4.5	3.5	2.2	6.7	4	1.3	3.5	3.2	4.9	4.7	5	2.4	4.4	4	4.2	5.7	3.2	6.1	4.7	6.9	3.7	6	4.6	3.7	4
Protein (g/100ml)	0.8	0.9	1.1	1.8	2.3	1.1	0.7	1.4	1	1.1	0.9	2	0.9	1.4	1.1	1.8	0.5	1	1.3	1.3	1.1	1.2	1.4	1.4	1.5	1.5	1.4	1.7	1.1	1.2	1.1	1.6	2.6	2	2.7	1.2	1.7	1.2	1.3	1.4	1.1	3.8	1.4	2.3	1.9	2.4	1.7	1.5	1.4
Carbohydrate (g/100ml)	8.5	10	7.8	9.6	7.5	8.1	8.3	8.1	10	9.9	8.7	9	8.3	9.7	8.9	9.5	9.6	8	10	9.5	9.5	8.6	9.3	9.3	9.6	9.2	8.7	9.1	9.6	10.1	9.6	9.8	9.9	9.2	8	9.7	8.8	9.8	9.1	10	10	8.3	9.7	8.7	8.7	9.9	9.3	9.3	9.6
Total solids (g/100ml)	15.3	12.4	12	15.1	14.6	11.3	12.9	13.7	13	13.9	12.4	14.1	12.8	16	14.1	16.3	15.1	16.8	13.1	13.8	12.6	13.8	14.7	14	15.5	14.3	12.5	17.7	14.9	12.7	14.4	14.8	17.5	16.1	15.9	13.6	15.1	15.2	14.8	17.3	14.5	18.4	16	18.2	14.6	18.4	15.8	14.6	15.2
Energy (kcal/100ml)	91	56	65	79	92	60	70	75	61	70	72	71	69	89	77	90	85	106	60	69	60	75	79	72	85	75	62	106	81	58	75	76	96	89	90	67	83	81	81	99	75	106	89	109	78	105	87	77	82
True Protein (g/100ml)	0.6	0.7	0.9	1.5	1.9	0.9	0.6	1.2	0.9	0.9	0.7	1.7	0.7	1.1	0.9	1.5	0.4	0.7	1.1	1.1	0.9	1	1.1	1.1	1.2	1.2	1.2	1.3	0.9	1	0.9	1.3	2.1	1.6	2.2	1	1.4	1	1	1.1	0.9	3.1	1.1	1.8	1.6	1.9	1.4	1.2	1.2
Osmolality (mOsm/Kg)	352	482	355	531	388	390	340	367	485	488	368	490	364	482	359	486	423	375	507	424	451	338	417	406	419	460	418	441	530	511	481	532	564	493	421	482	427	503	427	517	504	498	505	489	468	550	463	467	488
HMC3m (n=50)	1	2	3	4	5	6	7	8	9	10	11	12	13	14	15	16	17	18	19	20	21	22	23	24	25	26	27	28	29	30	31	32	33	34	35	36	37	38	39	40	41	42	43	44	45	46	47	48	49
Total lipids (g/100ml)	2.9	1.4	2.3	3.4	4.4	1.4	1.8	3.1	1.8	2.6	2.9	2.9	4.1	4.4	1.8	5.5	6.5	3.8	1.8	2.8	2.2	3.7	4	3.7	5.1	3.6	2.7	5.6	4.1	1.3	3.4	2.9	4.5	4.4	4.6	2.5	4	4.4	4.1	5.5	3	5.7	4.6	6.8	3.3	5.4	4.6	3.7	3.9
Protein (g/100ml)	0.5	0.9	0.8	1.4	1.8	1.2	0.5	0.8	1	1.1	0.6	2.2	0.9	1	0.8	2.1	0.4	0.7	1.1	1.2	1.1	1.1	1.2	1.4	1.4	1.3	1.8	1.5	1.5	1.1	1.1	1.5	2.4	2	2.5	1.3	1.5	1.5	1.3	1.5	1	3.7	1.2	2.5	1.9	2.1	1.7	1.4	1.4
Carbohydrate (g/100ml)	8.4	10	8.2	9.9	8	8.7	8.2	8.3	10	9.8	8.3	8.9	8.1	9.6	9	9.5	9.6	9.5	10.1	9.3	9.6	8.5	9.3	9.2	9.4	9.1	8.6	9.1	9.9	10.1	9.7	9.9	9.8	8.9	7.8	9.7	8.8	9.8	9.1	9.8	9.9	8.4	9.7	8.8	8.8	9.5	9.4	9.2	9.6
Total solids (g/100ml)	12	12.5	11.5	15	14.4	11.6	10.7	12.3	13	13.7	12	14.2	13.3	15.2	11.7	17.2	16.6	14.2	13.1	13.5	13.2	13.5	14.6	14.6	16.1	14.2	13.4	16.4	15.7	12.7	14.3	14.6	16.8	15.5	15.1	13.6	14.5	15.9	14.7	17.1	14.1	17.9	15.7	18.3	14.3	17.2	15.9	14.5	15
Energy (kcal/100ml)	62	57	58	78	80	53	52	65	61	68	63	72	74	84	56	98	100	76	62	68	64	73	79	78	91	76	68	95	84	57	75	73	91	85	84	67	79	86	80	97	71	102	87	109	74	97	88	77	80
True Protein (g/100ml)	0.4	0.7	0.7	1.2	1.5	1	0.4	0.6	0.8	0.9	0.5	1.8	0.7	0.8	0.7	1.7	0.2	0.6	0.9	1	0.9	0.9	1	1.2	1.1	1	1.5	1.2	1.2	0.9	0.9	1.2	1.9	1.6	2	1	1.2	1.2	1.1	1.2	0.9	3	1	1.9	1.6	1.7	1.4	1.2	1.1
Osmolality (mOsm/Kg)	353	474	353	531	386	391	330	363	485	487	358	489	342	483	400	492	474	437	502	454	450	371	440	447	461	496	416	432	519	513	471	527	557	487	416	482	427	498	431	431	512	503	500	500	484	554	462	468	486
HMC6m (n=50)	1	2	3	4	5	6	7	8	9	10	11	12	13	14	15	16	17	18	19	20	21	22	23	24	25	26	27	28	29	30	31	32	33	34	35	36	37	38	39	40	41	42	43	44	45	46	47	48	49
Total lipids (g/100ml)	3.2	1.2	2.4	3.6	4.5	1.5	2.1	3.5	1.6	2.5	3.1	2.7	3.9	4.3	2.1	5.1	6.7	4.1	1.9	2.9	2.1	3.7	4.2	3.6	5.2	3.8	2.8	6.2	4.1	1.3	3.4	3.2	4.2	4.3	4.6	2.7	3.9	4.2	4.1	5.5	3.1	5.9	4.4	7.1	3.1	5.3	4.6	3.2	2.9
Protein (g/100ml)	0.8	0.8	1.2	1.9	2.3	1.2	0.7	1.4	0.9	1.1	1.1	2.1	0.9	1.3	1	1.6	0.9	1.3	1.1	1.3	1.2	1.1	1.4	1.3	1.4	1.5	1.8	1.5	1.5	1.1	1.1	1.6	2.2	1.7	2.5	1.7	1.5	1.4	1.1	1.5	1.5	3.8	1.3	2.6	1.5	2.1	1.5	1.3	1.1
Carbohydrate (g/100ml)	8.3	10.1	8.2	9.8	7.7	8.8	8.2	8.2	10.1	9.9	8.4	9	8.2	9.7	8.9	9.6	9.8	9.4	10.1	9.5	9.7	8.6	9.3	9.4	9.5	9.2	8.6	9	9.9	10.2	9.6	9.5	9.7	9	7.8	8.8	8.8	9.7	9.2	9.8	9.7	8.4	9.8	8.9	8.7	9.5	9.2	8.9	9.4
Total solids (g/100ml)	12.5	12.4	12	15.5	14.7	11.7	11.2	13.3	12.8	13.8	12.7	13.9	13.2	15.5	12.2	16.6	17.6	14.9	13.3	13.9	13.2	13.6	15.1	14.4	16.3	14.6	13.4	16.9	15.7	12.9	14.3	14.4	16.3	15.2	15	13.4	14.5	15.4	14.6	16.9	14.5	18.2	15.7	18.8	13.4	17.1	15.5	13.7	13.5
Energy (kcal/100ml)	66	56	60	81	83	54	55	71	60	68	67	70	73	84	59	93	105	81	62	71	64	74	82	76	92	78	68	100	84	58	75	74	87	83	84	68	78	83	80	96	74	105	86	113	69	96	86	72	69
True Protein (g/100ml)	0.7	0.7	1	1.5	1.9	1	0.6	1.1	0.8	0.9	0.9	1.7	0.7	1.1	0.8	1.3	0.7	1	0.9	1.1	1	0.9	1.1	1.1	1.1	1.2	1.5	1.2	1.3	0.9	0.9	1.3	1.8	1.4	2	1.4	1.2	1.1	0.9	1.2	1.2	3.1	1	2	1.2	1.7	1.2	1.1	0.9
Osmolality (mOsm/Kg)	351	486	351	529	384	388	338	367	477	484	368	484	470	478	402	489	341	449	503	459	466	372	449	449	462	495	414	437	524	519	476	507	559	490	416	480	431	501	430	511	505	497	503	505	469	551	461	465	483
Selection and Classification	1	2	3	4	5	6	7	8	9	10	11	12	13	14	15	16	17	18	19	20	21	22	23	24	25	26	27	28	29	30	31	32	33	34	35	36	37	38	39	40	41	42	43	44	45	46	47	48	49
Dornic acidity	4	2	7	4	4	3	3	5	4	5	3	1	2	4	3	5	4	4	4	3	3	4	4	2	4	2	4	7	6	4	3	8	4	6	6	8	4	4	4	4	8	6	6	3	5	4	6	4	5
Microbiological control (HM Baseline)	Neg	Neg	Neg	Neg	Neg	Neg	Neg	Neg	Neg	Neg	Neg	Neg	Neg	Neg	Neg	Neg	Neg	Neg	Neg	Neg	Neg	Neg	Neg	Neg	Neg	Neg	Neg	Neg	Neg	Neg	Neg	Neg	Neg	Neg	Neg	Neg	Neg	Neg	Neg	Neg	Neg	Neg	Neg	Neg	Neg	Neg	Neg	Neg	Neg
Microbiological control (HMCI)	Neg	Neg	Neg	Neg	Neg	Neg	Neg	Neg	Neg	Neg	Neg	Neg	Neg	Neg	Neg	Neg	Neg	Neg	Neg	Neg	Neg	Neg	Neg	Neg	Neg	Neg	Neg	Neg	Neg	Neg	Neg	Neg	Neg	Neg	Neg	Neg	Neg	Neg	Neg	Neg	Neg	Neg	Neg	Neg	Neg	Neg	Neg	Neg	Neg
Microbiological control (HMC3m)	Neg	Neg	Neg	Neg	Neg	Neg	Neg	Neg	Neg	Neg	Neg	Neg	Neg	Neg	Neg	Neg	Neg	Neg	Neg	Neg	Neg	Neg	Neg	Neg	Neg	Neg	Neg	Neg	Neg	Neg	Neg	Neg	Neg	Neg	Neg	Neg	Neg	Neg	Neg	Neg	Neg	Neg	Neg	Neg	Neg	Neg	Neg	Neg	Neg
Microbiological control (HMC6m)	Neg	Neg	Neg	Neg	Neg	Neg	Neg	Neg	Neg	Neg	Neg	Neg	Neg	Neg	Neg	Neg	Neg	Neg	Neg	Neg	Neg	Neg	Neg	Neg	Neg	Neg	Neg	Neg	Neg	Neg	Neg	Neg	Neg	Neg	Neg	Neg	Neg	Neg	Neg	Neg	Neg	Neg	Neg	Neg	Neg	Neg	Neg	Neg	Neg
[truncated: 1 more columns]

## Sheet: Micronutrients
Samples	Sodium (mg/L)				Potassium (mg/L)				Calcium (mg/100ml)				Magnesium (mEq/L)				Phosphorus (mg/100ml)				Zinc (μg/100ml)				Copper (μg/100ml)
	HM Baseline	HMCI	HMC3m	HMC6m	HM Baseline	HMCI	HMC3m	HMC6m	HM Baseline	HMCI	HMC3m	HMC6m	HM Baseline	HMCI	HMC3m	HMC6m	HM Baseline	HMCI	HMC3m	HMC6m	HM Baseline	HMCI	HMC3m	HMC6m	HM Baseline	HMCI	HMC3m	HMC6m
1	78	96	92	98	601.6	741.15	729.95	936.55	28.4	36.6	38	41.4	2.28	2.84	2.78	2.8	15	22.45	20.35	18.7	96.5	85.5	84.5	93	19.2	22.8	23.2	19.8
2	64	112	138	130	512.95	984.15	835.5	896	18.7	30.8	37.2	36.6	1.76	2.8	2.98	3.06	9.75	8.4	14.4	13.15	93	147	158.5	151.5	23	21	20	15.6
3	52	114	114	114	500.85	530.65	729.75	1040.56	22.2	33.2	36.2	38.2	2.02	3.18	3.14	3.18	10.9	14.15	13.1	13.3	83.5	94	99	117.5	20.4	42.8	39	37.6
4	140	228	308	312	380.05	725.15	1313.7	1523.85	18.3	30.6	39.6	38.6	1.34	1.74	2.4	2.42	13.3	21.4	25.7	25.3	145	239.5	302	416.5	30.2	42.6	53.2	46.4
5	362	470	470	470	640.8	891.9	1080.95	1260.48	26.4	41.6	42.8	44.8	2.36	3.3	3.36	3.3	13.45	22.6	24.9	21.4	252.5	410.5	305	474	53.6	76.2	77	69.8
6	72	154	152	156	470.05	659.8	947.9	1262.92	23.8	44.2	44.4	45.4	1.76	2.84	2.92	2.9	9.55	14.8	12.95	13.35	88	103.5	83.5	127.5	24.4	49.4	47.4	45.6
7	70	74	76	76	635.6	538.8	717.7	945.1	25	29.4	28.6	30.2	2.58	2.86	2.74	2.72	11.75	12.85	13.25	11.85	83.5	54	62.5	82	20	23	20.2	19.6
8	58	90	124	88	523.9	722.4	818.6	1005.77	22	36.2	39.4	38.4	2.56	4.1	4.04	4.06	13	14.4	15.8	11.9	77.5	98	78.5	100.5	23	34.6	31.4	36.2
9	108	162	196	178	432.785	770.3	639.5	730.3	14.3	23.2	28.6	39.2	1.86	2.76	3.38	3.3	8.4	9.35	13.1	9.55	200	272	311	289.5	30	32.4	31.4	24
10	22	60	78	78	366.85	833.25	763.8	886.4	17.1	32	36.6	40.14	1.53	3	3.6	3.64	12.85	10.6	17.85	13.65	22.7	50	53.5	49.1	26	28.2	27.4	25.2
11	168	160	168	162	728	818.15	923.9	1267.79	31	35.4	38.4	38.4	2.6	3.5	3.54	3.46	15.85	14.6	12.55	16.2	138	140.5	179	201.5	33.6	56	48.4	47.2
12	336	792	638.9	535.8	512	828.8	1099.3	1063.2	23.6	38.8	44.78	44.3	2.3	4.18	4.52	5.02	6.55	14.05	15.3	12.65	24.7	34.6	55	48	22.6	28	25.8	25.4
13	78	184	182	182	565.65	685.5	842.3	1117.72	18.7	24.6	26.2	27.6	1.68	2.36	2.32	2.42	11.2	16.9	24.95	16.1	58	169	220.5	250	15.6	33.4	27.2	31.4
14	76	150	156	158	550.05	928.8	989.5	970.1	20.2	42.2	44.35	41.65	3.06	4.18	4.54	5.04	16.05	23.3	23.35	19.55	78.5	104	176.5	170	29.2	34.8	32.6	34
15	94	112	112	112	631.25	818.35	707.15	1157.24	22.6	20.6	29.2	31.8	2.2	3.32	2.6	3.14	25.15	27.95	12.85	11.1	106	146.5	133.5	154.5	19.2	34.2	24	27.2
16	138	190	200	190	768.3	1165.59	997.2	1651.1	27	45.6	47.4	48.4	1.8	2.98	2.5	2.78	45.4	30.7	31.35	31.45	433.5	446	376	486	45.8	65.2	60.8	57
17	70	104	108	108	565.7	952.3	756	1285.39	22	37	40.6	39.4	1.88	3.22	2.86	2.98	20.15	34.1	28.3	27.45	70	119	94.5	121.5	23.2	39.8	26.4	28.8
18	102	140	142	142	635.4	1086.2	786.75	1331.1	28.4	45.4	46	46.8	2.42	4.04	3.56	3.9	18.45	21.65	18.9	18.6	142.5	233	192	240	31.4	50.4	41	42.2
19	110	202	202	204	340.55	703.4	519.95	1034.85	13	24.2	24.2	28.6	1.51	2.88	2.8	2.82	10.85	11.05	9.95	11	62	119.5	104	135.5	15.8	32.4	19.6	20.8
20	128	220	226	230	562.7	1074.37	1085.86	1463.5	20.2	36.8	37.2	41.6	1.79	3.4	3.3	3.34	12.6	15.85	17.2	13.85	181	327.5	269.5	363.5	32.2	56.8	46	48.8
21	60	90	92	90	511.25	889.4	917.2	1247.94	29.2	45.2	47.2	46.2	2.04	4.08	3.84	3.8	10.75	14.85	15.95	12.8	58.5	114.5	88.5	123	21.2	39	27.6	30
22	106	132	134	130	738.55	901.75	954.45	1234.7	31.2	35	37	39.2	2.16	2.52	2.34	2.34	6.5	18.6	18.75	17	241.5	256	193.5	280	42.6	56	44	42
23	134	172	190	188	733.35	1157.24	1205.29	1664.22	26.4	44.4	44.2	46.2	1.92	2.86	2.86	2.98	17.35	22.5	22.5	20.05	197.5	281	202	355.5	33.4	60.2	46.2	48.6
24	290	232	238	238	475.85	996.3	986.45	1365.8	18.7	38	37.6	39.4	2.42	2.86	2.78	2.7	7.8	15.8	15.2	15.1	73.5	191.5	131	237	14	51	37.4	39.6
25	112	170	174	172	728.6	1121.37	1109.71	1783.13	28.2	48.8	48	49	1.57	2.94	2.98	3.12	18.35	24.95	25.7	24.45	191	254	282	411.5	40	67.2	48.4	58.2
26	464	450	700	710	541.8	1155.15	1088.99	1490.47	14.8	39.6	36.4	35	2	3.26	3.68	3.66	12.05	22.7	17.75	14.55	160	318.5	272	321	36.4	68.4	50.4	58
27	222	298	304	384	928.9	1423.9	1342.83	1408.4	21.6	29.8	32	41.72	1.9	2.56	2.62	3.08	15.7	12.75	13.65	19.8	238.5	244.5	290.5	358	59.2	80.6	62.2	65.2
28	84	116	126	146	594.3	915.05	859.75	952.9	24.2	37.8	40.2	41.63	1.94	2.84	2.88	3.2	17.1	17.15	14.8	25.25	205.5	195.5	259	295.5	38.8	58.2	42	39
29	42	122	202	216	545.75	1081.85	1252.12	1160.3	21.8	37	36.6	40.72	1.65	3.18	3.2	3.64	12.85	17.2	16.6	24.9	48.2	130	205	240	19	52.8	47	45.4
30	60	108	176	126	553.8	1044.25	968.3	963.2	21	38.6	41.81	45.39	1.75	3.08	3.34	3.62	8.45	8	16.3	13.65	41.1	83.5	124	82	23.6	26.8	29	21.2
31	76	136	152	172	575.1	985.8	1012.04	844.5	23.2	36.2	37.4	41.28	2.32	3.1	2.96	3.38	12.25	14.15	11.75	19.6	31.1	110	191.5	213.5	19.4	36.4	41.2	35
32	118	252	250	260	685.75	1441.2	1263.09	1233.8	25.6	41	37.8	46.82	1.39	3.56	3.58	4.08	14.35	12.65	15.5	20.15	277	122.5	202.5	223	47	54.2	49.4	43.4
33	98	268	266	292	530.7	1624.2	1671.2	1487.6	25.4	38.2	37	42.07	1.59	4.1	4.56	4.9	12.65	25.95	25.65	33.95	123	331.5	635	715	30	60	57.2	48
34	54	500	470	435.1	470.25	1051.04	1064.27	963.1	27.4	41.6	42.2	45.92	1.98	4.28	4.12	4.58	12.3	18.35	15.9	23.4	95.5	61.5	108.5	129.5	26.6	51.8	45.2	45
35	174	610	590	492.6	688.75	1149.58	1129.38	1013	29.8	38.2	41	43.62	2.52	4.06	4.16	4.56	14.15	18.55	18.9	23.7	104	64.5	107	154.5	42.4	44.8	41.2	45.4
36	70	120	144	132	532.8	798.7	855.2	973.5	22.2	31	38	39.8	2.46	3.58	4.02	3.88	10.1	17.6	19.4	14.6	82.5	171	201	190.5	33.2	40.2	33.8	32.8
37	388	244	280	280	617.05	1154.28	1176.56	1086	28.2	39.6	39.2	43.92	2.04	3	3.2	3.34	16.7	17	16.05	23.05	167.5	275	307	284	41.4	125	46	43
38	112	128	126	146	601.1	1196.93	1194.32	1066.7	31.2	41.2	40	41.71	2.62	3.62	4.06	4.14	14.85	20.7	22.25	29.35	107.5	224.5	196	177	19.4	27.4	27	20
39	162	152	160	164	1066.5	1197.8	1176.91	1161.9	18.5	23.8	24.6	26	3.14	3.16	3.28	4.58	20.85	15.75	18.8	24.2	650	325	345.5	328	59.2	36.2	32	27.6
40	130	222	218	236	679.15	1092.47	1196.41	967.9	30.4	50	50.6	55.45	2.78	4.14	4.26	5.3	20.25	21.05	25.75	28.45	73.5	185	116.5	110	41	51	48	45.2
41	52	110	116	126	336.1	879.15	895.25	866.7	21.2	38.6	39	45.73	2.16	3.94	4.2	4.76	12.45	13.1	14.2	18.5	70	201	114	142	20.4	21.8	20	18.6
42	316	592	581.6	455.2	990.3	1913.3	1491.5	1389.5	30.6	53.2	50.76	49.3	3.52	4.62	5.76	5.64	22.1	24.25	32.8	28.9	530	535	715	665	84.6	96.6	93.6	72
43	86	226	264	246	498.75	1010.99	954.2	928.5	20.6	40	42.93	39.4	2.32	3.76	4.22	5	15.95	15.65	25.05	19.95	117.5	218.5	216.5	204	34.8	47.6	39.6	37.4
44	122	92	555.5	419.6	634.6	1170.12	1100	1087.7	17.9	31.8	36.2	38.6	2.72	4	4.84	5.24	15.5	27.7	41.75	42.1	153.5	196	206.5	211	54	39.8	42	35
45	74	760	649.4	541.1	603.3	1111.62	1050	1010.9	22.4	33.2	35.6	39.6	2.22	3.26	3.62	3.72	9.85	12.3	17.9	20.1	63	179	223	217	23.8	41.4	40	37.8
46	70	134	202	166	582.1	1587.1	1350	1262.4	21.8	42.8	47.41	48.42	2.04	5.36	6.38	6.14	10.4	30.5	40.75	36.75	59.5	198.5	384.5	374	24.2	63.4	54.6	56
47	122	190	214	192	748.1	1176.56	1094.4	1056.6	18.1	25.6	30.4	31.8	1.9	3.06	3.42	3.24	21.45	18.9	28.75	24.6	401.5	570	640	605	55.8	68.8	60.8	52.2
48	266	270	290	274	786.5	886.6	1043.7	983.5	21	33.2	34.4	31.8	2.26	3.84	3.84	4.32	15.55	17.5	21.3	17.7	116	180.5	224	193.5	41.8	33	29.2	26.6
49	146	172	208	206	481	902.7	931.3	961.3	27.4	35.6	42.1	39.8	2.64	3.64	3.66	4	12.8	21	21.75	33.1	41.2	78	108	98.5	44	41.8	36.8	38.6
50	216	244	288	300	682.95	1216.61	1131.5	1169.1	19.1	28.8	36	34.6	1.85	3.08	3.36	3.48	19.65	25.3	40.5	25.35	299.5	505	595	575	58.8	69.6	64	54.4
